# Supplementary material for: Massive computational acceleration by using neural networks to emulate mechanism-based biological models
Source: PubMed Central journal article supplement (PMC6761138; doi:10.1038/s41467-019-12342-y), 2019-09-25
Supplement: 41467_2019_12342_MOESM1_ESM.pdf [file 41467_2019_12342_MOESM1_ESM.pdf]

## 13 **Supplementary Notes**

### 14 **I. Supplemental PDE Model Descriptions**

#### 15 **Model development**

16 The pattern formation circuit is from Payne, et al.<sup>1</sup>. The circuit consists of a mutant T7 RNA  
17 polymerase (T7RNAP) that activates its own expression as well as the expressions of LuxR and LuxI.  
18 Once activated by T7RNAP, LuxI mediates synthesis of an acyl-homoserine lactone (AHL), which  
19 can diffuse across the cell membrane. When the global AHL concentration surpasses a threshold,  
20 intracellular AHL binds to LuxR to activate the synthesis of T7RNAP lysozyme. Lysozyme then binds  
21 to the T7RNAP and forms a complex, therefore inhibiting the T7RNAP binding to the T7RNAP  
22 promoter. This complex also inhibits T7RNAP transcription. CFP and mCherry fluorescent proteins  
23 are used to report the circuit dynamics since they are co-expressed with T7RNAP and lysozyme  
24 respectively (Supplementary Figure 1).

25 The gene circuit dynamics can be described using the following partial differential equations  
26 (adopted from Cao et al<sup>2</sup>), which describe the cell growth, colony expansion, nutrient and AHL  
27 diffusion, intracellular circuit dynamics, as well as signaling and transport. Parameters are described in  
28 Supplementary Table 1. This PDE model corresponds to the hydrodynamic limit of the stochastic  
29 agent-based model from Payne et al.<sup>1</sup>. Because the air pocket between the glass plate and dense agar  
30 is only 20  $\mu\text{m}$  high, the system was modeled in two spatial dimensions and vertical variations in gene  
31 expression profiles were neglected. Although the PDE formulation is computationally less expensive  
32 to solve numerically than the stochastic agent-based model and better facilitates the development of  
33 mechanistic insights into the patterning dynamics, it still needs a lot of computational power when  
34 extensive parameter search is needed.

35

$$\begin{cases}
\frac{\partial C}{\partial t} = \kappa_C \Delta C + \alpha_C \frac{1}{1 + \alpha T + \beta L} \cdot \frac{N}{K_N + N} C \left(1 - \frac{C}{\bar{C}}\right), \\
\frac{dN}{dt} = -\frac{\alpha_N}{|\Omega|} \int_{\Omega} C \left(1 - \frac{C}{\bar{C}}\right) \frac{N}{K_N + N} d\sigma, \\
\frac{dA}{dt} = \frac{\alpha_A}{|\Omega|} \int_{\Omega} C \frac{T}{K_T + T} \frac{K_P}{K_P + P} \varphi(x, C) d\sigma - d_A A, \\
\frac{\partial L}{\partial t} = \kappa_C \frac{\nabla L \cdot \nabla C}{C} - \alpha_C L \frac{1}{1 + \alpha T + \beta L} \frac{N}{K_N + N} \left(1 - \frac{C}{\bar{C}}\right) - d_L L + \alpha_L \frac{T}{K_T + T} \frac{A^m}{K_A^m + A^m} \varphi(x, C) - k_1 T L + k_2 P, \\
\frac{\partial T}{\partial t} = \kappa_C \frac{\nabla T \cdot \nabla C}{C} - \alpha_C T \frac{1}{1 + \alpha T + \beta L} \frac{N}{K_N + N} \left(1 - \frac{C}{\bar{C}}\right) - d_T T + \alpha_T \frac{T}{K_T + T} \frac{K_P}{K_P + P} \varphi(x, C) - k_1 T L + k_2 P, \\
\frac{\partial P}{\partial t} = \kappa_C \frac{\nabla P \cdot \nabla C}{C} - \alpha_C P \frac{1}{1 + \alpha T + \beta L} \frac{N}{K_N + N} \left(1 - \frac{C}{\bar{C}}\right) + k_1 T L - k_2 P, \\
\frac{\partial \psi_R}{\partial t} = \kappa_C \frac{\nabla \psi_R \cdot \nabla C}{C} - \alpha_C \psi_R \frac{1}{1 + \alpha T + \beta L} \frac{N}{K_N + N} \left(1 - \frac{C}{\bar{C}}\right) + \alpha_L \frac{T}{K_T + T} \frac{A^m}{K_A^m + A^m} \varphi(x, C), \\
\frac{\partial \psi_C}{\partial t} = \kappa_C \frac{\nabla \psi_C \cdot \nabla C}{C} - \alpha_C \psi_C \frac{1}{1 + \alpha T + \beta L} \frac{N}{K_N + N} \left(1 - \frac{C}{\bar{C}}\right) + \alpha_T \frac{T}{K_T + T} \frac{K_P}{K_P + P} \varphi(x, C).
\end{cases} \quad (1)$$

36

37  $C(t, \mathbf{x})$  is the cell density;  $N(t)$  is the nutrient concentration;  $A(t)$  is the AHL concentration;  
38  $L(t, \mathbf{x}), T(t, \mathbf{x}), P(t, \mathbf{x})$  are cellular lysozyme, T7RNAP and the T7-lysozyme complex density  
39 respectively;  $\psi_R(t, \mathbf{x})$  and  $\psi_C(t, \mathbf{x})$  are mCherry and CFP, which are co-expressed with lysozyme and  
40 T7RNAP, respectively, and act as reporters in experiments. These are added in order to allow for a  
41 direct comparison between model and experiment;

42 The following assumptions were made in deriving these equations:

- 43 1. Cells are assumed to perform an unbiased random walk; their movement is modeled as diffusion<sup>3-</sup>  
44 <sup>5</sup>. We considered "diffusion" as an approximation of the observed colony expansion, so that cell  
45 movement can be described by a single lumped parameter. Intracellular components are modeled  
46 with passive-tracer equations<sup>2</sup>.
- 47 2. Cell growth is modeled by a logistic term, along with a Monod function. The Monod function is  
48 to account for the contribution of nutrient to overall colony growth. The nutrient here refers to  
49 one or more limiting factors that constrain growth. The logistic term accounts for the limit of cell  
50 growth in a particular location. This carrying capacity is unlikely limited by nutrient availability.  
51 Instead, it is limited by the spatial confinement imposed by our device, which is the colony height  
52 confined to be  $\sim 20 \mu m$  between the coverslip and the agar surface.
- 53 3. Fast diffusion of AHL and nutrient.

54 4. Gene expression capacity:

$$\varphi(x, C) = \begin{cases} \frac{K_\varphi^n}{K_\varphi^n + (R_\varphi - x)^n}, & x \leq R_\varphi \\ 1, & x > R_\varphi \end{cases} \quad (2)$$

55 where  $R_\varphi$  is defined as the distance between the colony center and the location where cell density is  
56 95% of the carrying capacity.

57 5. Assume that  $L, T$  and  $P$  are at equilibrium due to the reversible first-order kinetics of T7RNAP  
58 bind with T7 lysozyme to form T7-lysozyme complex is fast<sup>6</sup>.

$$P = \frac{k_1}{k_2} TL \quad (3)$$

#### 59 **Non-dimensionalization of the model**

60 First, we rescaled the time and space variables as

$$\hat{t} = \alpha_c t, \quad \hat{x} = \frac{x}{\mathcal{L}}, \quad (4)$$

61 where  $\mathcal{L}$  is a length scale to be chosen later.

62 We next rescaled the state variables,

$$\hat{C} = \frac{C}{\bar{C}}, \quad \hat{N} = \frac{N}{N_0}, \quad \hat{A} = \frac{A}{K_A}, \quad \hat{L} = \frac{d_L}{\alpha_L} L, \quad \hat{T} = \frac{T}{K_T}, \quad \hat{P} = \frac{P}{K_P}, \quad \hat{\psi}_R = \frac{\psi_R}{\alpha_L}, \quad \hat{\psi}_C = \frac{\psi_C}{\alpha_T}. \quad (5)$$

63 Then we defined some new parameters for simplicity,

$$\hat{\alpha} = \alpha K_T, \quad \hat{\beta} = \frac{\alpha_L}{d_L} \beta. \quad (6)$$

64 With these dimensionless variables, and by defining  $\hat{\varphi}(\hat{x}, \hat{C}) = \varphi(x, C)$ , we can rewrite the  
65 model equations in a dimensionless form. Introducing the parameter groups  $G_i, (i = 1, \dots, 12)$  (see  
66 Supplementary Table 2), the non-dimensioned equations become:

$$\begin{cases}
\frac{\partial \hat{C}}{\partial t} = G_1 \Delta \hat{C} + \frac{1}{1 + \hat{\alpha} \hat{T} + \hat{\beta} \hat{L}} \hat{C} (1 - \hat{C}) \frac{\hat{N}}{G_2 + \hat{N}}, \\
\frac{d \hat{N}}{dt} = -G_3 \int_{\Omega} \hat{C} (1 - \hat{C}) \frac{\hat{N}}{G_2 + \hat{N}} d\sigma, \\
\frac{d \hat{A}}{dt} = G_4 \int_{\Omega} \hat{C} \frac{\hat{T}}{1 + \hat{T}} \frac{1}{1 + \hat{P}} \varphi(\hat{x}, \hat{C}) d\sigma - G_5 \hat{A}, \\
\frac{\partial \hat{L}}{\partial t} = G_1 \frac{\nabla \hat{L} \cdot \nabla \hat{C}}{\hat{C}} - \hat{L} \frac{1}{1 + \hat{\alpha} \hat{T} + \hat{\beta} \hat{L}} \frac{\hat{N}}{G_2 + \hat{N}} (1 - \hat{C}) - G_6 \hat{L} + G_7 \frac{\hat{T}}{1 + \hat{T}} \frac{\hat{A}^m}{1 + \hat{A}^m} \varphi(\hat{x}, \hat{C}), \\
\frac{\partial \hat{T}}{\partial t} = G_1 \frac{\nabla \hat{T} \cdot \nabla \hat{C}}{\hat{C}} - \hat{T} \frac{1}{1 + \hat{\alpha} \hat{T} + \hat{\beta} \hat{L}} \frac{\hat{N}}{G_2 + \hat{N}} (1 - \hat{C}) - G_8 \hat{T} + G_9 \frac{\hat{T}}{1 + \hat{T}} \frac{1}{1 + \hat{P}} \varphi(\hat{x}, \hat{C}), \\
\frac{\partial \hat{P}}{\partial t} = G_1 \frac{\nabla \hat{P} \cdot \nabla \hat{C}}{\hat{C}} - \hat{P} \frac{1}{1 + \hat{\alpha} \hat{T} + \hat{\beta} \hat{L}} \frac{\hat{N}}{G_2 + \hat{N}} (1 - \hat{C}), \\
\frac{\partial \widehat{\psi}_R}{\partial t} = G_1 \frac{\nabla \widehat{\psi}_R \cdot \nabla \hat{C}}{\hat{C}} - \widehat{\psi}_R \frac{1}{1 + \hat{\alpha} \hat{T} + \hat{\beta} \hat{L}} \frac{\hat{N}}{G_2 + \hat{N}} (1 - \hat{C}) + G_{mcherry} \frac{\hat{T}}{1 + \hat{T}} \frac{\hat{A}^m}{1 + \hat{A}^m} \varphi(\hat{x}, \hat{C}), \\
\frac{\partial \widehat{\psi}_C}{\partial t} = G_1 \frac{\nabla \widehat{\psi}_C \cdot \nabla \hat{C}}{\hat{C}} - \widehat{\psi}_C \frac{1}{1 + \hat{\alpha} \hat{T} + \hat{\beta} \hat{L}} \frac{\hat{N}}{G_2 + \hat{N}} (1 - \hat{C}) + G_{CFP} \frac{\hat{T}}{1 + \hat{T}} \frac{1}{1 + \hat{P}} \varphi(\hat{x}, \hat{C}).
\end{cases} \quad (7)$$

67 The definition of parameter groups  $G_i$ , ( $i = 1, \dots, 12$ ) can be found in Supplementary Table 2.  
68 Supplementary Equation 3 becomes

$$\hat{P} = \frac{G_{10}}{G_{11} G_{12}} \hat{T} \hat{L} \quad (8)$$

### 69 Numerical solver for the PDE model

70 To solve the model numerically in Matlab, we exploit the radial symmetry of the system and  
71 reduce it to a PDE in polar coordinates, only depending on one spatial variable, namely the radius  
72  $r \in [0, R]$ . We combine the Matlab built-in Runge-Kutta solver ode45 with a second order centered  
73 finite difference scheme for discretization of the gradients. Due to the radial symmetry, we use the 1D  
74 distribution along the radius as the ground truth for training/testing the neural network  
75 (Supplementary Figure 1B) without losing any information.

76 In addition, due to the assumption that  $L, T$  and  $P$  are at equilibrium, the  $L$ - $T$ - $P$  system is updated  
77 in each step by projecting it onto the manifold defined by  $P = \frac{G_{10}}{G_{11} G_{12}} TL$ . With this constraint, the  
78 concentrations are updated to  $(L_1, T_1, P_1)$

$$L_1 = \frac{1}{2} \left( L_0 - G_{10}T_0 - G_{11} + \sqrt{(L_0 - G_{10}T_0 - G_{11})^2 + 4G_{11}(L_0 + G_{12}P_0)} \right), \quad (9)$$

79

$$P_1 = P_0 + \frac{1}{G_{12}}(L_0 - L_1), \quad (10)$$

$$T_1 = T_0 - \frac{1}{G_{10}}(L_0 - L_1). \quad (11)$$

80

81 Although the PDE model is computationally less expensive than the stochastic agent-based  
 82 model<sup>1</sup>, it still imposes a prohibitive barrier for practical applications while intensive parameter  
 83 searching or estimation are needed, even when computer clusters are used.

#### 84 **Parameter screening and the execution of PDE model**

85 Each dimensionless parameter (Supplementary Table 1) is a combination of several parameters  
 86 with units (Supplementary Table 2). Rather than estimating dimensionless parameters directly, we  
 87 search values of dimensional parameters in a realistic range, and then determine the corresponding  
 88 dimensionless parameters. We have 13 dimensional parameters randomly picked from predefined  
 89 ranges. Some due to lack of literature estimations/measurements; some can be tuned with varying pH,  
 90 temperature, nutrient, agar density and other factors (marked bold in Supplementary Table 1). Other  
 91 parameters are fixed with specific values either from literature or from experiments.

92 Our approach is complementary to the Design of Experiment approach. For instance, even with  
 93 proper Design of Experiment approach, the total computational demand for a specific model can still  
 94 be large (depending on the number of parameter sets to run). If so, our approach will be useful for  
 95 accelerating the predictions that are deemed necessary. Conversely, when an NN is properly trained  
 96 to make fast and accurate predictions, it will alleviate the need for aggressive optimization when taking  
 97 the Design of Experiment approach.

98

## 99 II. Supplemental SDE Model Descriptions

### 100 Model description

101 The deterministic Ordinary differential equations (ODE) for the Myc-E2F system, developed in  
 102 the previous work, served as the basis for the stochastic Rb-E2F model<sup>7,8</sup>.

$$\begin{cases}
 \frac{d[MC]}{dt} = \frac{k_{MC}[S]}{K_S + [S]} - d_{MC}[MC], \\
 \frac{d[EFm]}{dt} = \left( k_S \frac{[S]}{K_S + [S]} + k_{EFm} \frac{[MC]}{K_{MC} + [MC]} \frac{[EFp]}{K_{EF} + [EFp]} + \frac{k_b[MC]}{K_{MC} + [MC]} \right) \frac{K_R}{K_R + [MC]} - d_{EFm}[EFm], \\
 \frac{d[EFp]}{dt} = k_{EFp}[EFm] \frac{K_{MR}}{K_{MR} + [MR]} + \frac{k_{p1}[CD][RE]}{K_{CD} + [RE]} + \frac{k_{p2}[CE][RE]}{K_{CE} + [RE]} - k_{RE}[RB][EFp] \\
 \quad - (1 + K_{AFR}[AF])d_{EFp}[EFp] \\
 \frac{d[CD]}{dt} = \frac{k_{CD}[MC]}{K_{MCCD} + [MC]} + \frac{k_{CDS}[S]}{K_S + [S]} - d_{CD}[CD] \\
 \frac{d[CE]}{dt} = \frac{k_{CE}[EFp]}{K_{EF} + [EFp]} - d_{CE}[CE], \\
 \frac{d[RB]}{dt} = k_{RB} + \frac{k_{DP}[RP]}{K_{RP} + [RP]} - k_{RE}[RB][EFp] - \frac{k_{p1}[CD][RB]}{K_{CD} + [RB]} - \frac{k_{p2}[CE][RB]}{K_{CE} + [RB]} - d_{RB}[RB], \\
 \frac{d[RP]}{dt} = \frac{k_{p1}[CD][RB]}{K_{CD} + [RB]} + \frac{k_{p2}[CE][RB]}{K_{CE} + [RB]} + \frac{k_{p1}[CD][RE]}{K_{CD} + [RE]} + \frac{k_{p2}[CE][RE]}{K_{CE} + [RE]} - \frac{k_{DP}[RP]}{K_{RP} + [RP]} - d_{RP}[RP], \\
 \frac{d[RE]}{dt} = k_{RE}[RB][EFp] - \frac{k_{p1}[CD][RE]}{K_{CD} + [RE]} - \frac{k_{p2}[CE][RE]}{K_{CE} + [RE]} - d_{RE}[RE], \\
 \frac{d[AF]}{dt} = k_{AFb} + k_{AFMC} \frac{[MC]}{K_{AFMC} + [MC]} + \frac{k_{AFEF}[EFp]}{K_{AFEF} + [EFp]} - d_{AF}[AF], \\
 \frac{d[MR]}{dt} = k_{MRMC} \frac{[MC]}{K_{MRMC} + [MC]} + \frac{k_{MREF}[EFp]}{K_{MREF} + [EFp]} - d_{MR}[MR],
 \end{cases} \tag{12}$$

103

104 where  $[S]$  is the growth signals (e.g. serum);  $[MC]$ ,  $[EFm]$ ,  $[EFp]$ ,  $[CD]$ ,  $[CE]$ ,  $[RB]$ ,  $[RP]$ ,  
 105  $[AF]$ ,  $[MR]$  are the concentrations of Myc, E2F mRNA, E2F protein, CycD, CycE, Rb and  
 106 Phosphorylated Rb, ARF and miRNA.  $[RE]$  is the concentration of RB-E2F complex.

107 Initial conditions:

$$108 \quad [RB]=[RE]=[M]=[E]=[CD]=[CE]=[RP]=0\mu M.$$

109 Parameters are defined in Supplementary Table 5.

110 The above is the deterministic ODE model of the system. To capture stochastic aspect of the  
 111 Rb-E2F signaling pathway, we adopt the Chemical Langevin Formulation (CLF)<sup>9</sup>. We adjust the units

112 of the molecule concentrations and the parameters so that the molecules are expressed in molecular  
 113 numbers.

$$\frac{dX_i(t)}{dt} = \sum_{j=1}^M v_{ji} a_j[X(t)] + \sum_{j=1}^M v_{ji} a_j^{\frac{1}{2}}[X(t)] \Gamma_j(t) + \omega_i(t) \quad (13)$$

114  $X_i(t)$  represents the number of molecules of a molecular species  $I$  ( $i=1, \dots, N$ ) at time  $t$ , and  
 115  $X(t) = (X_1(t), \dots, X_N(t))$  is the state of the entire system at time  $t$ . The mean molecule number for  
 116 E2F would be approximately 1,000.  $X(t)$  evolves over time at the rate of  $a_j[X(t)]$  ( $j= 1, \dots, M$ ), and  
 117 the corresponding change in the number of individual molecules is described in  $v_{ji}$ .  $\Gamma_j(t)$  and  $\omega_i(t)$   
 118 are temporally uncorrelated, statistically independent Gaussian noises. This formulation retains the  
 119 deterministic framework (the first term), and intrinsic noise (reaction-dependent) and extrinsic noise  
 120 (reaction-independent). We assumed a mean of 0 and variance of 5 for  $\Gamma_j(t)$ , and a mean of 0 and  
 121 variance of 50 for  $\omega_i(t)$ . The resulting stochastic differential equations (SDEs) were implemented  
 122 and solved in Matlab. Serum concentration is fixed at  $[S] = 1\%$ .

123 Twenty-four parameters of the SDE model are generated randomly (Supplementary Table 5).  
 124 The ranges cover almost all the possible rates that can be found in vivo. For each of the generated  
 125 combination of parameters, we sample  $10^4$  stochastic simulations and collect the final values of all 10  
 126 variables. We split the values into 100 bins to construct a histogram for each variable. Since the large  
 127 number of simulations, the histograms are almost continuous. We create a kernel distribution object  
 128 by using MATLAB function *fitdist()*. Then we use Matlab function *pdf()* to get the probability density  
 129 function of the distribution object, evaluated at the values in each of the discretized intervals (Each of  
 130 the variables are discretized into 1,000 intervals for this model).

131



### 132 III. Supplemental Deep Learning Methods

133 Deep learning through the training of artificial neural networks has made immense  
134 contributions in various fields, such as computer vision<sup>10-12</sup>, speech recognition<sup>13-16</sup>, and beating the  
135 world champion at the game of Go<sup>17-19</sup>. This is a result of fast GPUs, high availability of data, and also  
136 the advancements of the algorithms for training deep neural networks. Over the last decade, deep  
137 learning is also becoming increasingly important for diverse biological researches<sup>20-27</sup>. Among all the  
138 applications, a predictive model was developed based on statistical associations among features of a  
139 given dataset. The learned model can then be used to predict desired outputs, such as binary responses  
140 (e.g., pathogenic or non-pathogenic, toxic or non-toxic), categorical labels (e.g., bacteria strains, stages  
141 of diseases), values (e.g., growth rate, drug doses) or sequences (e.g., time/spatial series, probability  
142 density functions).

143 Several previous studies have demonstrated how to adopt neural networks to facilitate  
144 numerically solving differential equations<sup>28-37</sup>. The massive acceleration enables extensive exploration  
145 of the system dynamics that is impossible by solely dependent on the mechanistic model. In our study,  
146 we use LSTM network, a type of recurrent neural network (RNN), for prediction of the normalized  
147 distribution.

148

#### 149 Recurrent neural networks

150 RNNs are a family of deep neural networks for processing sequential data<sup>38-40</sup>. Different from  
151 a feedforward neural network, a recurrent neural network has connections pointing backward. It will  
152 send the predicted output back to itself. Supplementary Figure 2A is a demonstration of a recurrent  
153 neuron (the simplest RNN, composed of only one neuron receiving inputs, producing outputs, and  
154 sending the outputs back to itself). At each sequential step (also called a frame), this recurrent neuron  
155 receives input  $x_s$  as well as its own output from previous sequential step  $y_{s-1}$ . By unrolling the  
156 network against the sequential inputs, we can see that each member of the output is a function of the  
157 previous output, and is produced using the same update rule applied to the previous outputs, which  
158 results in the sharing of parameters through a very deep computational graph.

$$159 \quad y_s = h(y_{s-1}; x_s; \theta) = h(h(y_{s-2}; x_{s-1}; \theta); x_s; \theta) = h(h(h(y_{s-3}; x_{s-2}; \theta); x_{s-1}; \theta); x_s; \theta)$$

160 Since the output of a recurrent neuron at step  $s$  is a function of all the inputs from previous steps,  
161 it seems to have a form of memory. However, the ordinary RNN cannot be used on long-sequence  
162 data. The memory of the first inputs gradually fades away due to the transformations that the data  
163 goes through when traversing an RNN, some information is lost after each step. After a while, the  
164 RNN state contains virtually no trace of the first inputs<sup>41</sup>. To solve this problem, various types of cells  
165 with long-term memory have been introduced and the most successful/popular one is the long short-  
166 term memory (LSTM) network.

### 167 **LSTM network**

168 The LSTM network was proposed in 1997 by Sepp Hochreiter and Jurgen Schmidhuber<sup>42</sup>, and  
169 it was gradually improved over the years by Alex Graves<sup>43</sup>, Wojciech Zaremba<sup>44</sup>, and many more.  
170 Supplementary Figure 2B showed the architecture of an LSTM cell. An internal recurrence (a self-  
171 loop, shown in red) is added on top of the outer recurrence of the RNN (shown in orange). This self-  
172 loop is responsible for memorizing long-term dependencies<sup>40</sup>. LSTM also has more parameters and a  
173 system of gating units to control the flow of information. The state unit, which has the linear self-  
174 loop, is the most important component and its weight is controlled by a forget gate unit (The weight  
175 can be a value between 0 and 1 via a sigmoid unit).

176 In order to use LSTM network to predict the distribution, we need to discretize the distribution  
177 into a sequence of  $n$  consecutive values ( $n=501$  for the first example). Each value is associated with  
178 an LSTM module. So there are 501 LSTM modules in our deep LSTM network for predicting the  
179 synthetic patterns. For each of the LSTM module, the inputs consist both the outputs from fully  
180 connected layer and outputs of the previous  $m$  neighboring LSTM modules ( $m=16$  in Supplementary  
181 Figure 2C demonstration). The output of each LSTM module ( $LSTM_i$ ) is a single value corresponding  
182 to the  $i$ th value among the  $n$  consecutive values.

183 Supplementary Figure 2D demonstrates the structure of the employed deep LSTM network,  
184 which consists of an input layer with inputs to be the parameters of mechanism-based model, a fully  
185 connected layer (with  $l$  nodes), LSTM arrays (consist of  $n$  LSTM modules), and two output layers, one  
186 for predicting peak values of distributions, one for predicting the normalized distributions. First, the  
187 parameters of differential equations are connected to the neural network through a fully connected  
188 layer. Fully connected layer means all the inputs are connected to all the neurons in that layer. The  
189 activation function is ELU (Exponential Linear Unit) and the connection weight is initialized

190 randomly using *He* initialization method<sup>45</sup>. It is then connected to another fully connected layer with  
191 1 neuron for peak value prediction. The output of the first fully connected layer is also connected to  
192 a sequence of LSTM modules for predicting distributions. We use Adam optimization algorithm (the  
193 momentum decay hyperparameter  $\beta_1 = 0.5$ , the scaling decay hyperparameter  $\beta_2 = 0.999$ ) to  
194 adaptive moment estimation and gradient clipping to prevent exploding gradients.

195 To predict the patterns from PDE model demonstrated in this paper, we use  $l=64$ ,  $n=501$ ,  
196  $m=16$ . To predict the probability distribution from SDE model demonstrated in this paper, we use  
197  $l=256$ ,  $n=1000$ ,  $m=64$ . The initial learning rate is  $10^{-4}$ .

198 The learning process itself refers to finding the optimal set of network parameters that translate  
199 the features in the input data into accurate predictions of the labels. The parameters are found through  
200 a series of back and forth steps (a.k.a. backpropagation), where parameters are estimated, the model  
201 performance is evaluated, errors are identified and corrected, and then the process repeats, until the  
202 model performance cannot be improved upon, which is assessed by the minimization of the model  
203 error. Once the optimal parameters are identified, the network can be used to make predictions using  
204 new data.

205

## 206 Supplementary Tables

### 207 Supplementary Table 1. Definitions and the values of parameters used in the PDE model

- 208 • To generate the training/test datasets, the values of 13 parameters were randomly picked from  
 209 prespecified ranges (bold) and other parameters were fixed.
- 210 • The values of parameters mentioned in the main text are normalized to be between 0 and 1 with  
 211 the following formulation: normalized parameter value = (parameter value-min)/(max-min).

212

| Parameter         | Description                                                                        | Defined value or search range   | Base Unit                                        |
|-------------------|------------------------------------------------------------------------------------|---------------------------------|--------------------------------------------------|
| $k_1$             | Combination rate of T-Lys complex <sup>6</sup>                                     | 400                             | molecule <sup>-1</sup> ·h <sup>-1</sup> ·cell    |
| $k_2$             | Dissociation rate of T-Lys complex <sup>6</sup>                                    | 10800                           | h <sup>-1</sup>                                  |
| $k_D (= k_1/k_2)$ | Equilibrium association constant of T7-lysozyme complex <sup>6</sup>               | 0.037                           | molecule <sup>-1</sup> ·cell                     |
| $\kappa_C$        | <b>Cellular diffusion coefficient (depend on agar density)<sup>46</sup></b>        | <b>0.001-0.005</b>              | <b>cm<sup>2</sup>·h<sup>-1</sup></b>             |
| $\alpha_C$        | <b>Cell growth rate on agar</b>                                                    | <b>0.2-2</b>                    | <b>h<sup>-1</sup></b>                            |
| $\alpha_N$        | Nutrient depletion rate (Fit with experiments)                                     | 155                             | molecule·h <sup>-1</sup> ·cell <sup>-1</sup>     |
| $\alpha_A$        | <b>AHL synthesis rate<sup>47</sup></b>                                             | <b>20- 2.0 × 10<sup>5</sup></b> | <b>molecule·h<sup>-1</sup>·cell<sup>-1</sup></b> |
| $\alpha_L$        | <b>Synthesis rate of T7 lysozyme</b>                                               | <b>90 - 9 × 10<sup>3</sup></b>  | <b>molecule·h<sup>-1</sup>·cell<sup>-1</sup></b> |
| $\alpha_T$        | <b>Synthesis rate of T7RNAP</b>                                                    | <b>80 - 8 × 10<sup>3</sup></b>  | <b>molecule·h<sup>-1</sup>·cell<sup>-1</sup></b> |
| $d_A$             | <b>AHL degradation rate<sup>47</sup></b>                                           | <b>0.05-2</b>                   | <b>h<sup>-1</sup></b>                            |
| $d_L$             | Degradation rate of T7 lysozyme <sup>1</sup>                                       | 0.0144                          | h <sup>-1</sup>                                  |
| $d_T$             | Degradation rate of T7RNAP <sup>1</sup>                                            | 0.3                             | h <sup>-1</sup>                                  |
| $K_A$             | Concentration threshold of AHL to half-maximum of the pLuxI promoter <sup>48</sup> | 20                              | nM                                               |
| $K_N$             | Half-saturation for nutrient uptake (Fit with experiments)                         | 20                              | nM                                               |
| $K_T$             | <b>Half activation constant of T7RNAP</b>                                          | <b>50 - 5 × 10<sup>3</sup></b>  | <b>molecule·cell<sup>-1</sup></b>                |
| $K_P$             | <b>Half inhibition of T-Lys complex</b>                                            | <b>50 - 5 × 10<sup>3</sup></b>  | <b>molecule·cell<sup>-1</sup></b>                |
| $K_\phi$          | <b>Half activation distance for gene expression</b>                                | <b>0 - 10</b>                   | <b>cm</b>                                        |
| $\hat{\alpha}$    | <b>Inhibition factor of T7RNAP on Growth</b>                                       | <b>0 - 5</b>                    |                                                  |
| $\hat{\beta}$     | <b>Inhibition factor of T7 lysozyme on Growth</b>                                  | <b>0 - 2 × 10<sup>3</sup></b>   |                                                  |
| $m$               | Hill coefficient of AHL mediated gene expression <sup>1</sup>                      | 2                               |                                                  |

|                                             |                                                                         |                       |                        |
|---------------------------------------------|-------------------------------------------------------------------------|-----------------------|------------------------|
| $n$                                         | <b>Hill coefficient for distance-dependent gene expression capacity</b> | <b>0 - 5</b>          |                        |
| $\bar{C}$                                   | Cell carrying capacity (Fit with experiments)                           | $3 \times 10^5$       | cells·ml <sup>-1</sup> |
| $\mathcal{L}$                               | Non-dimensionalized factor for space (Fit with experiments)             | 0.18898               | cm                     |
| $N_0$                                       | Initial nutrient concentration (Fit with experiments)                   | 66.67                 | nM                     |
| $ \Omega _0$                                | Normalization factor for domains (Fit with experiments)                 | $1.69 \times 10^{-8}$ | cm <sup>2</sup>        |
| $\mathbf{D}(= \frac{ \Omega }{ \Omega _0})$ | <b>Non-dimensionalized domain radius</b>                                | <b>1.0-3.0</b>        |                        |

213

**Supplementary Table 2. Expressions and values of parameters in non-dimensional model**

| Non-dimensionalized parameter | Expression                                                                                  | Value                                                        |
|-------------------------------|---------------------------------------------------------------------------------------------|--------------------------------------------------------------|
| $G_1$                         | $\frac{\kappa_C}{\alpha_C \mathcal{L}^2}$                                                   | $28 \times \frac{\kappa_C^*}{\alpha_C}$                      |
| $G_2$                         | $\frac{K_N}{N_0}$                                                                           | 0.3                                                          |
| $G_3$                         | $\frac{\alpha_N \bar{C}}{\alpha_C N_0} \frac{\mathcal{L}^3}{ \Omega } \frac{1}{10^{-4} cm}$ | $0.0046 \times \frac{1}{\alpha_C D^2}^*$                     |
| $G_4$                         | $\frac{\alpha_A \bar{C}}{\alpha_C K_A} \frac{\mathcal{L}^3}{ \Omega } \frac{1}{10^{-4} cm}$ | $9.95 \times 10^{-5} \times \frac{\alpha_A}{\alpha_C D^2}^*$ |
| $G_5$                         | $\frac{d_A}{\alpha_C}$                                                                      | $\frac{d_A}{\alpha_C}$                                       |
| $G_6$                         | $\frac{d_L}{\alpha_C}$                                                                      | $\frac{0.0144}{\alpha_C}$                                    |
| $G_7$                         | $\frac{d_L}{\alpha_C}$                                                                      | $\frac{0.0144}{\alpha_C}$                                    |
| $G_8$                         | $\frac{d_T}{\alpha_C}$                                                                      | $\frac{0.3}{\alpha_C}$                                       |
| $G_9$                         | $\frac{\alpha_T}{\alpha_C K_T}$                                                             | $\frac{\alpha_T}{\alpha_C K_T}$                              |
| $G_{10}$                      | $\frac{K_T d_L}{\alpha_L}$                                                                  | $\frac{0.0144 \times K_T}{\alpha_L}$                         |
| $G_{11}$                      | $\frac{d_L}{\alpha_L k_D}$                                                                  | $\frac{0.3892}{\alpha_L}$                                    |
| $G_{12}$                      | $\frac{K_P d_L}{\alpha_L}$                                                                  | $\frac{0.0144 \times K_P}{\alpha_L}$                         |
| $G_{mCherry}$                 | $\frac{1}{\alpha_C}$                                                                        | $\frac{1}{\alpha_C}$                                         |
| $G_{CFP}$                     | $\frac{1}{\alpha_C}$                                                                        | $\frac{1}{\alpha_C}$                                         |

216 \* \* By comparing the experiment colony expansion with Fisher-KPP's traveling wave solution with  
 217 wave speed <sup>49</sup>, we can estimate that  $\mathcal{L} = 0.18898 \text{ cm} = 1889.8 \text{ } \mu\text{m}$ .

219 **Supplementary Table 3. Using the mechanism-based model to validate 3-ring patterns**  
220 **generated from LSTM networks.** We use an ensemble of trained deep LSTM networks to screen  
221 through the parameter space. It takes around 12 days to screen through  $10^8$  combinations of  
222 parameter sets, which would need thousands of years if we could generate these by using PDE  
223 simulations. We find 1284 three-ring pattern distributions, including novel patterns not present in the  
224 training sets. We then use their parameter combinations as inputs to generate numerical simulations  
225 from the PDE model and compare the distributions generated from LSTM network and from  
226 numerical simulations, we find most of the distributions from numerical simulations are consistent  
227 with that from network predictions. The mean value of the root mean squared errors (RMSEs)  
228 between NN predicted distributions and PDE simulations is 0.079 and the standard deviation is 0.008.  
229 If setting the threshold of RMSE between distributions generated by the neural network and the  
230 distributions generated by numerical simulations to be 0.1, there are 1203 found distributions with  
231  $RMSE < 0.1$  and only 81 with  $RMSE > 0.1$ .

| Total | RMSE<0.1 | RMSE>0.1 |
|-------|----------|----------|
| 1284  | 1203     | 81       |

232

233 **Supplementary Table 4. Accuracy analysis of the test dataset for the PDE model.** We calculate  
 234 the averaged values of RMSEs and  $L^2$  norms between predicted distributions from neural network(s)  
 235  $\mathbf{p}$  and that from numerical simulations  $\mathbf{q}$  for test dataset (20,000 samples). The network prediction  
 236 can be from one neural network, or an ensemble of neural networks (4 ensembles are chosen for  
 237 comparison in this table). Since the final prediction of an ensemble of neural networks is based on the  
 238 disagreement of distributional values, we can see ensemble neural networks have better accuracy on  
 239 predicting distributional value than, and almost the same accuracy on predicting peak value as, single  
 240 neural network.

|                            |                      | RMSE    |        |                  | $L^2$ norm |        |                  |
|----------------------------|----------------------|---------|--------|------------------|------------|--------|------------------|
|                            |                      | no ring | 1 ring | 2 rings and more | no ring    | 1 ring | 2 rings and more |
| single NN                  | peak value           | 0.35    | 0.19   | 0.14             | 0.35       | 0.19   | 0.14             |
|                            | distributional value | 0.0097  | 0.013  | 0.019            | 0.22       | 0.30   | 0.42             |
| ensemble NNs (4 ensembles) | peak value           | 0.35    | 0.20   | 0.16             | 0.35       | 0.20   | 0.16             |
|                            | distributional value | 0.0049  | 0.0085 | 0.014            | 0.11       | 0.19   | 0.31             |

241  $*RMSE = \sqrt{\frac{1}{n} \sum_{i=1}^n (\mathbf{p}_i - \mathbf{q}_i)^2}$ ,  $n=501$  for distributions and  $n=1$  for peak value.

242  $*L^2\text{-norm} = \sqrt{\sum_{i=1}^n (\mathbf{p}_i - \mathbf{q}_i)^2}$ ,  $n=501$  for distributions and  $n=1$  for peak value.

243 \*when  $n=1$ , the values of RMSE and  $L^2$ -norm are the same.

244



245 **Supplementary Table 5. Parameters for the SDE model.**

246 To generate the training/test datasets, the values of 24 parameters were randomly picked from  
 247 prespecified ranges (bold) and other parameters were fixed.

| Constant   | Value                                                | Description and source                                                                                                                  |
|------------|------------------------------------------------------|-----------------------------------------------------------------------------------------------------------------------------------------|
| $k_{MC}$   | <b>0.2-5 <math>\mu\text{M}/\text{h}</math></b>       | <b>MYC synthesis rate</b>                                                                                                               |
| $k_S$      | 0.05 $\mu\text{M}/\text{h}$                          | EFm synthesis rate (serum) (Arbitrary value adjusted to match experimental observations presented here and <sup>50,51</sup> )           |
| $k_{EFm}$  | <b>0.08-2.0 <math>\mu\text{M}/\text{h}</math></b>    | <b>EFm synthesis rate</b>                                                                                                               |
| $k_h$      | <b>0.03-0.75 <math>\mu\text{M}/\text{h}</math></b>   | <b>EFp-independent EFm synthesis rate (serum)</b>                                                                                       |
| $k_{EFp}$  | <b>0.08-2.0 /h</b>                                   | <b>E2F translation rate</b>                                                                                                             |
| $k_{CD}$   | <b>0.01-0.1 <math>\mu\text{M}/\text{h}</math></b>    | <b>CYCD synthesis rate (MYC)</b>                                                                                                        |
| $k_{CDS}$  | <b>0.1-2.0 <math>\mu\text{M}/\text{h}</math></b>     | <b>CYCD synthesis rate (serum)</b>                                                                                                      |
| $k_{CE}$   | <b>0.07-1.5 <math>\mu\text{M}/\text{h}</math></b>    | <b>CYCE synthesis rate</b>                                                                                                              |
| $k_{RB}$   | <b>0.05-0.9 <math>\mu\text{M}/\text{h}</math></b>    | <b>RB synthesis rate</b>                                                                                                                |
| $k_{RE}$   | <b>36-360 /(<math>\mu\text{M}*\text{h}</math>)</b>   | <b>RB-E2F formation rate</b>                                                                                                            |
| * $k_{DP}$ | 3.6 $\mu\text{M}/\text{h}$                           | RB dephosphorylation rate <sup>52</sup>                                                                                                 |
| * $k_{p1}$ | 18 /h                                                | RB phosphorylation rate mediated by CYCD <sup>52</sup>                                                                                  |
| * $k_{p2}$ | 18 /h                                                | RB phosphorylation rate mediated by CYCE <sup>52</sup>                                                                                  |
| $k_{AFb}$  | 0.007 $\mu\text{M}/\text{h}$                         | Basal ARF synthesis rate (Arbitrary value - included based on role in nucleolar integrity in absence of oncogenic stress) <sup>53</sup> |
| $k_{AFEf}$ | <b>0.003-0.075 <math>\mu\text{M}/\text{h}</math></b> | <b>Synthesis rate of ARF by EFp</b>                                                                                                     |
| $k_{AFMC}$ | <b>0.002-0.05 <math>\mu\text{M}/\text{h}</math></b>  | <b>Synthesis rate of ARF by MYC</b>                                                                                                     |
| $k_{MREF}$ | <b>0.16-4.0 <math>\mu\text{M}/\text{h}</math></b>    | <b>Synthesis rate of miRNA by EFp</b>                                                                                                   |
| $k_{MRMC}$ | <b>0.04-1.0 <math>\mu\text{M}/\text{h}</math></b>    | <b>Synthesis rate of miRNA by MYC</b>                                                                                                   |
| $K_{AFMC}$ | <b>0.2-5.0 <math>\mu\text{M}</math></b>              | <b>Half-maximal MYC concentration (ARF synthesis)</b>                                                                                   |
| $K_{AFEf}$ | <b>0.1-2.5 <math>\mu\text{M}</math></b>              | <b>Half-maximal EFp concentration (ARF synthesis)</b>                                                                                   |
| $K_{MRMC}$ | <b>0.05-1.25 <math>\mu\text{M}</math></b>            | <b>Half-maximal MYC concentration (miRNA synthesis)</b>                                                                                 |
| $K_{MREF}$ | <b>0.05-1.25 <math>\mu\text{M}</math></b>            | <b>Half-maximal EFp concentration (miRNA synthesis)</b>                                                                                 |
| $K_{MC}$   | <b>0.03-0.75 <math>\mu\text{M}</math></b>            | <b>Half-maximal MYC concentration (EFm autoregulation)</b>                                                                              |
| $K_{MC1}$  | <b>0.5-12.5 <math>\mu\text{M}</math></b>             | <b>Half-maximal MYC concentration (EFp-independent EFm regulation)</b>                                                                  |

|            |                            |                                                                                                                    |
|------------|----------------------------|--------------------------------------------------------------------------------------------------------------------|
| $K_s$      | 0.1%-2.5%                  | Half-maximal serum concentration                                                                                   |
| $K_{EF}$   | 0.03-0.75 $\mu\text{M}$    | Half-maximal EFp concentration (E2F autoregulation)                                                                |
| $K_R$      | 20-200 $\mu\text{M}$       | Half-maximal repression of EFm by MYC (Adjusted to match observations from this study)                             |
| $K_{MR}$   | 0.6 $\mu\text{M}$          | Half-maximal miRNA concentration (EFp repression) (Adjusted according to experimental observations <sup>54</sup> ) |
| $K_{AFR}$  | 0.002-0.05 / $\mu\text{M}$ | A constant to account for ARF-mediated EFp decay <sup>55</sup>                                                     |
| $K_{RP}$   | 0.002-0.05 $\mu\text{M}$   | Michaelis-Menten constant for constitutive dephosphorylation <sup>52</sup>                                         |
| $K_{CD}$   | 0.92 $\mu\text{M}$         | Half-maximal CYCD concentration (RB phosphorylation) <sup>56,57</sup>                                              |
| $K_{CE}$   | 0.92 $\mu\text{M}$         | Half-maximal CYCE concentration (RB phosphorylation) <sup>56,57</sup>                                              |
| $K_{MCCD}$ | 0.15 $\mu\text{M}$         | Half-maximal MYC concentration (CYCD synthesis) <sup>58</sup>                                                      |
| $d_{EFm}$  | 0.25 /h                    | EFm decay constant <sup>59,60</sup>                                                                                |
| $d_{EFp}$  | 0.35 /h                    | EFp decay constant <sup>61</sup>                                                                                   |
| $d_{CD}$   | 1.5 /h                     | CYCD decay constant <sup>62,63</sup>                                                                               |
| $d_{CE}$   | 1.5 /h                     | CYCE decay constant <sup>64,65</sup>                                                                               |
| $d_{RB}$   | 0.06 /h                    | RB decay constant <sup>66</sup>                                                                                    |
| $d_{RP}$   | 0.06 /h                    | Phospho-RB decay constant <sup>66</sup> (assume to be the same as $d_{RB}$ )                                       |
| $d_{RE}$   | 0.03 /h                    | RB-E2F decay constant <sup>67</sup>                                                                                |
| $d_{MC}$   | 0.7 /h                     | MYC decay constant <sup>68-70</sup>                                                                                |
| $d_{AF}$   | 0.12 /h                    | ARF decay constant <sup>71-74</sup>                                                                                |
| $d_{MR}$   | 2.8 /h                     | miR-17-92 cluster miRNA decay constant <sup>75</sup>                                                               |

249 **Supplementary Table 6. Accuracy analysis for deep LSTM network prediction system.** We  
 250 used different evaluation methods to evaluate the agreement between predicted distribution by neural  
 251 network and the distribution generated by numerical simulation. The test sample size is  $s (=10,000)$ .  
 252 For each of the distribution, there are 1,000 discrete points representing space segregation.

|      | $R^2$ | $L^2$ norm | *K-S distance |
|------|-------|------------|---------------|
| Myc  | 0.998 | 0.1294     | 0.0134        |
| E2Fm | 0.993 | 0.2610     | 0.0433        |
| E2Fp | 0.989 | 0.4909     | 0.0544        |
| CD   | 0.998 | 0.1814     | 0.0173        |
| RB   | 0.925 | 2.2244     | 0.1162        |
| CE   | 0.994 | 0.3405     | 0.0432        |
| RP   | 0.990 | 0.5080     | 0.0447        |
| RE   | 0.986 | 0.6303     | 0.0486        |
| AF   | 0.996 | 0.3677     | 0.0360        |
| MR   | 0.995 | 0.3009     | 0.0306        |

253 \*The Kolmogorov–Smirnov statistic quantifies a distance between the empirical distribution  
 254 function of the sample and the cumulative distribution function of the reference distribution, or  
 255 between the empirical distribution functions of two samples. It is a non-parametric test that compares  
 256 2 cumulative distributions. Kolmogorov-Smirnov (K-S) distance is the supremum (greatest) distance  
 257 between 2 cumulative distributions. Its value is between 0 and 1. A small distance between two  
 258 distributions will result in a high similarity value between those distributions.

259 **Supplemental Figures**

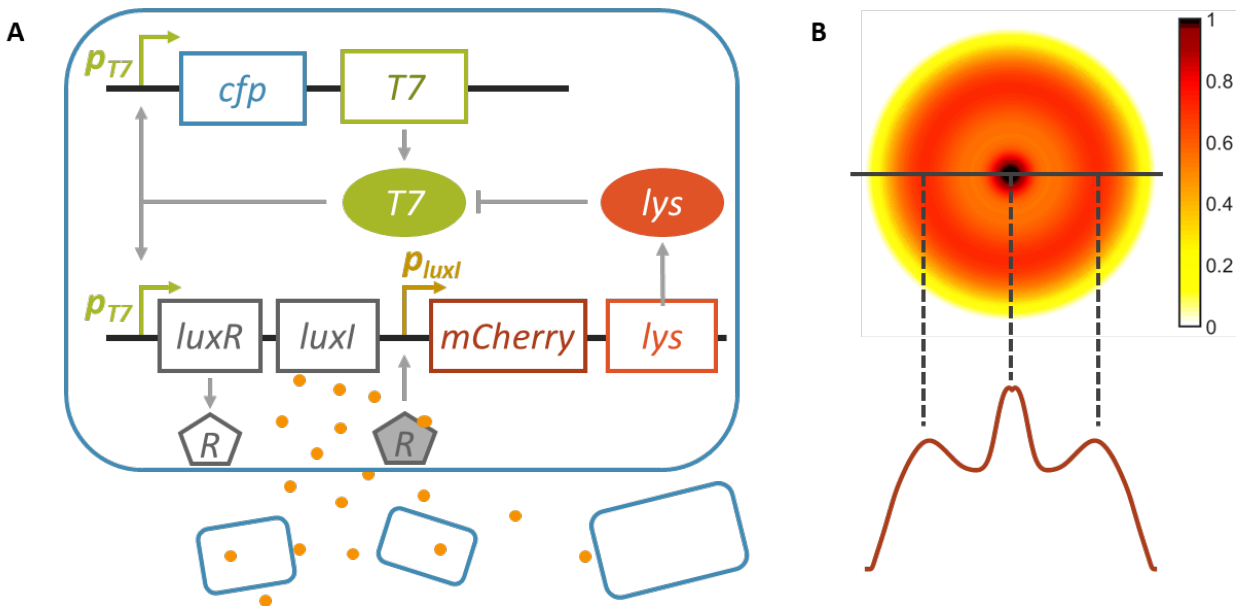

260

261 **Supplementary Figure 1: PDE model description**

262 **A. A pattern-formation circuit.** The circuit consists of a T7 RNA polymerase that activates its own  
 263 expression as well as the expression of LuxR and LuxI. Upon activation by T7RNAP (T7), LuxI  
 264 mediates synthesis of AHL (orange dots), which can diffuse across the cell membrane. When the  
 265 global AHL concentration surpasses a threshold, intracellular AHL binds to LuxR (R) to activate  
 266 the synthesis of T7 lysozyme (lys). Lysozyme then binds to the T7RNAP and forms a T7-lysozyme  
 267 complex, therefore inhibiting the T7RNAP binding to the T7 promoter. This complex also  
 268 inhibits T7RNAP transcription.

269 **B. A schematic plot showing that the 1D concentration along a radius line is sufficient to**  
 270 **represent the spherical geometry of the 2D pattern.** We choose hot colormap in Matlab and  
 271 normalized the maximum concentration to be 1 for the plot. The 1D curves are used as ground  
 272 truth of our model.

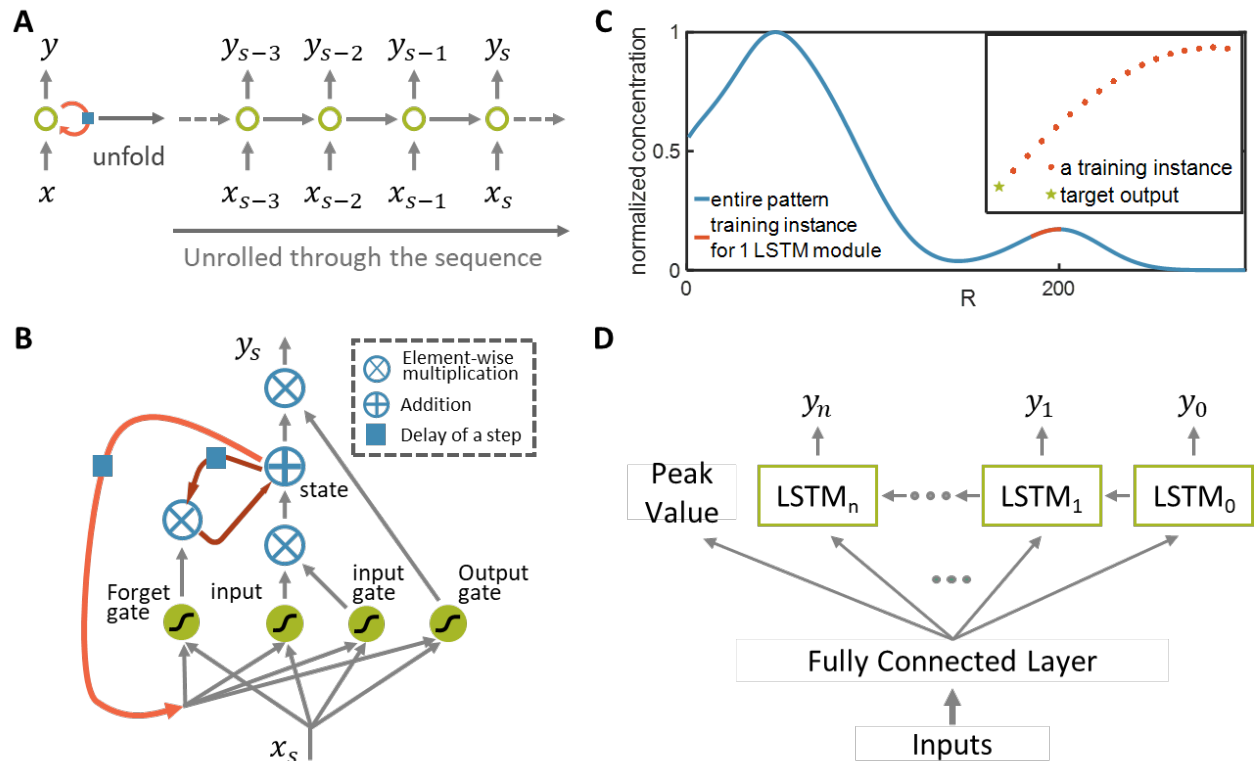

273

274

275

**Supplementary Figure 2: Introduction to the concept of deep LSTM networks and the structure of the employed deep LSTM network.**

276

277

278

279

280

**A. A recurrent neuron.** A recurrent neuron receives a sequential input  $x$ , produces an output and sends that output back to itself. At each sequential step  $s$ , this recurrent neuron receives input  $x_s$  as well as its own output from previous sequential step  $y_{s-1}$ . The blue block indicates a delay of a single sequential step. This neuron (left) is the same as the unrolling computational graph (right), where each node is now associated with one particular sequential instance.

281

282

283

284

285

286

287

**B. A typical LSTM neural network unit.** In TensorFlow, LSTM cells can be simply implemented by using `tf.contrib.rnn.BasicLSTMCell` built-in function without needing to know the cell structure. In short, LSTM cells manage two state vectors, one is responsible for short-term memory and one is responsible for long-term memory. For each step, it adds some memories to long-term memories (controlled by input gate), drop some memories (controlled by the forget gate) and decide which parts of the long-term memories should be read and output at this step (controlled by the output gate). More details can be found at the referenced books<sup>40,76</sup>.

288

289

290

291

292

293

**C. A training instance.** We discretize the x-axis into 501 points, so the entire pattern becomes a continuous pattern distribution series and is what we want to predict (blue line). Each point is associated with an LSTM module. There are 501 LSTM modules in total. For each module, the target output is a single value (green star), and the inputs are outputs of the previous  $m$  ( $m=16$  in the figure demonstration, red dots) neighboring LSTM modules. Red line and the small figure window represent a training instance from that series for one LSTM module.

294 **D. The structure of the employed deep LSTM network.** The employed deep LSTM network  
295 consists of an input layer with inputs to be the parameters of mechanism-based model, a fully  
296 connected layer, LSTM arrays, and 2 output layers, one for predicting peak value of the  
297 distribution, one for predicting the normalized distribution.  
298

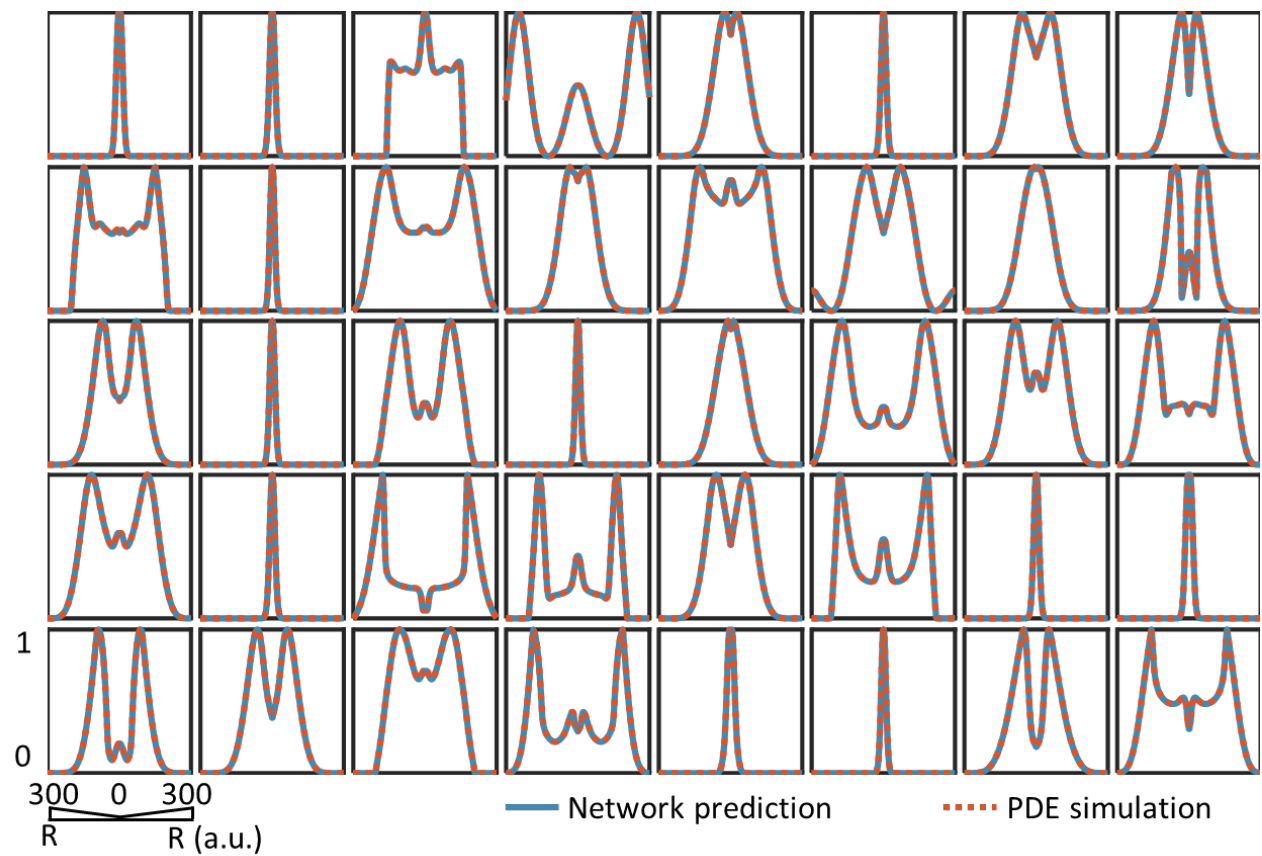

299

300 **Supplementary Figure 3: Comparison between predicted distributions generated by neural**  
 301 **network and distributions generated by mechanism-based model.** These examples are randomly  
 302 selected from the training dataset.  
 303

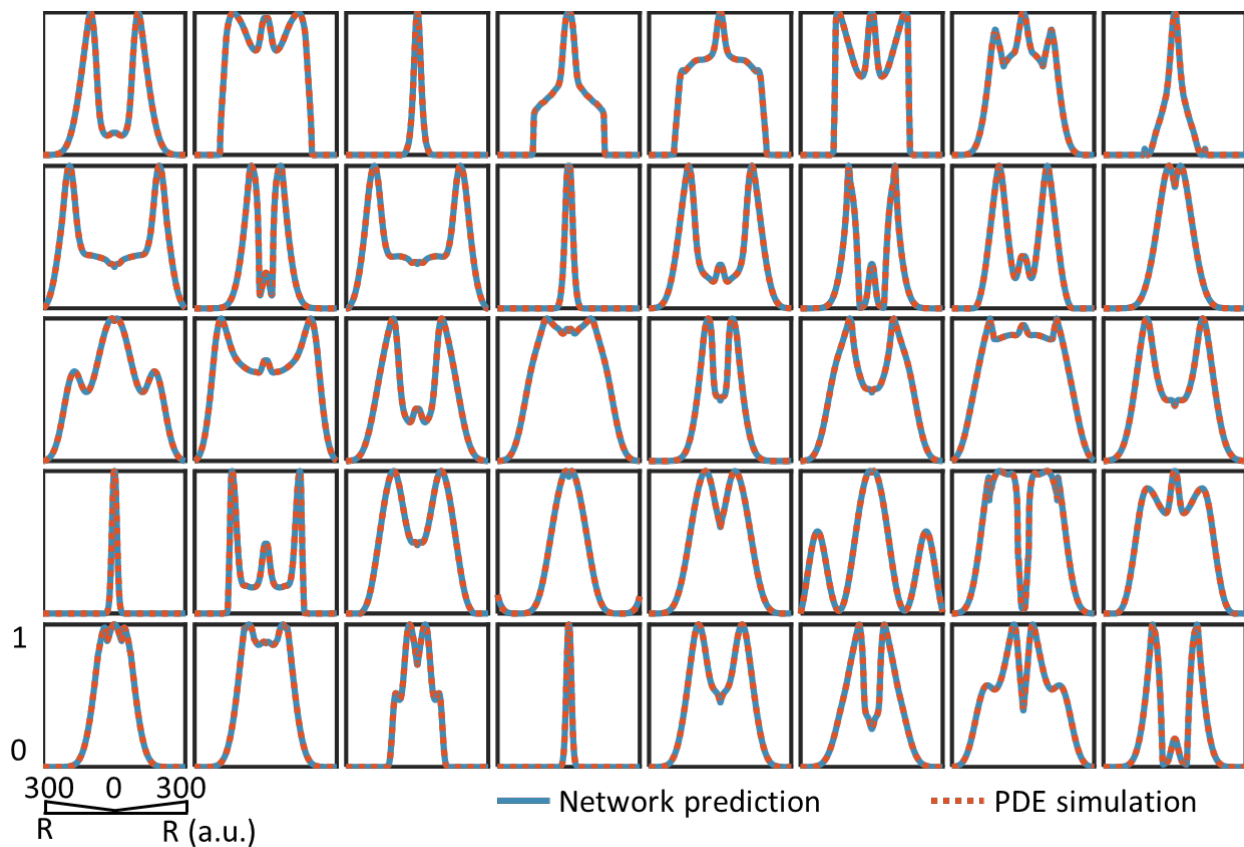

**Supplementary Figure 4: Comparison between predicted distribution generated by neural network and distribution generated by mechanism-based model.** These are randomly selected from the test dataset, i.e., the dataset generated by mechanism-based model, however, never been used to train the neural networks.



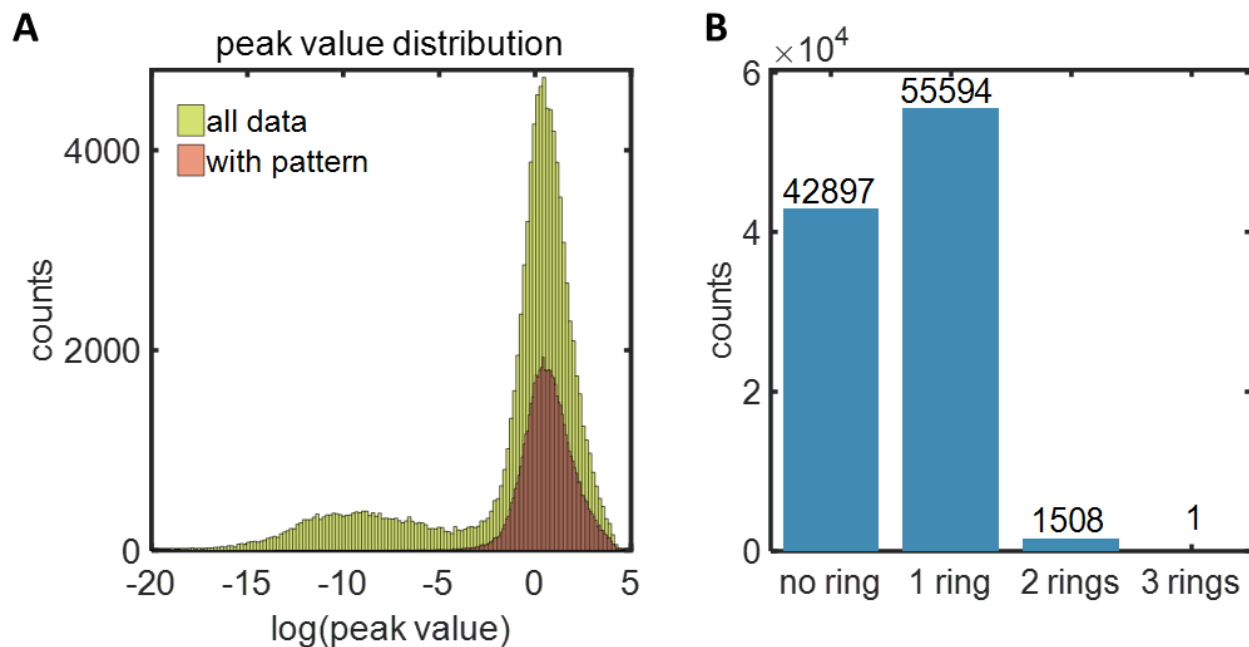

310

311 **Supplementary Figure 5: Analysis of the training data acquired from simulation.**

312 **A. Peak value distribution.** The total training data size is  $10^5$ . The peak value for all the training  
 313 data can be as low as  $10^{-20}$ , or as high as  $10^5$ . The peak value for data with pattern (one or more  
 314 than one ring) is more concentrated at the higher end.

315 **B. Data pattern structure.** The training dataset consists of 42897 sets of data with no ring, 55594  
 316 sets of data with 1 ring, 1508 sets of data with 2 rings and only 1 set of data with 3 rings.

317

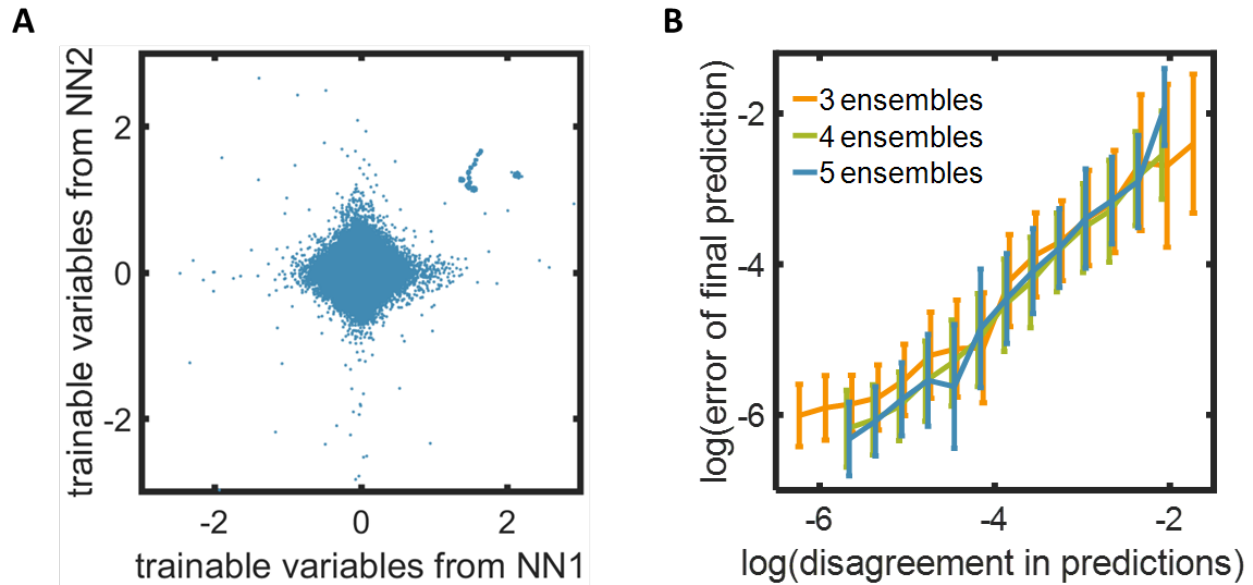

318

319 **Supplementary Figure 6: Ensemble prediction analysis**

320 **A. Comparison of trainable variables (weights, bias) between 2 trained neural networks.** The  
 321 difference in parameterization is due to random initialization and the properties of  
 322 backpropagation.

323 **B. The increased disagreement in prediction is positively correlated with the increased error**  
 324 **in predictions.** We test the positive correlation between logarithm value of disagreement in  
 325 prediction and logarithm value of error of final prediction using 3, 4, 5 ensembles of LSTM  
 326 networks. We do not find significant differences while using different number of LSTM ensembles.  
 327 We used 4 ensembles of LSTM networks in the main text for analysis.

328

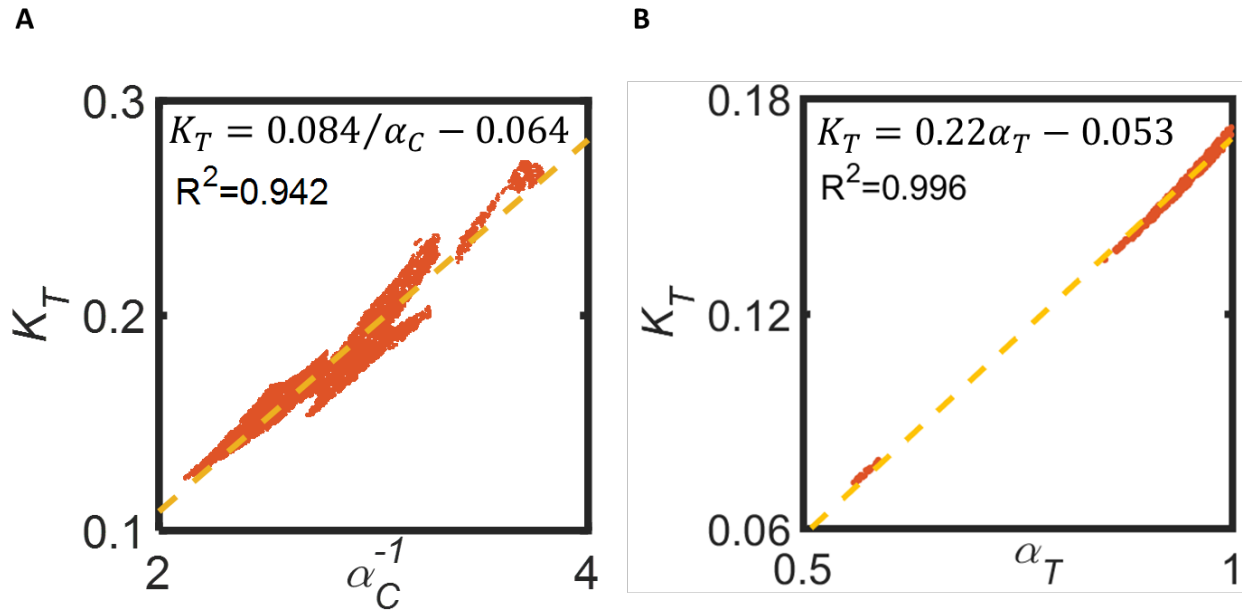

329

330 **Supplementary Figure 7: Relationship of parameters to generate 3-ring patterns.** We screened  
 331 through  $10^8$  combinations of parameter sets using the ensemble prediction method, where we  
 332 discarded predictions with disagreement in predictions larger than 0.1. For each of the screening, we  
 333 vary two parameters of interest and fixed the rest and we only plot the parameter combinations that  
 334 can generate 3-rings. These NN predictions reveal the general criterion for generating 3-ring patterns.

335 **A. Negative relationship between cell growth rate on agar ( $\alpha_C$ ) and half activation constant**  
 336 **of T7RNAP ( $K_T$ ).** If approximating that they are inversely proportional, we can get the fitting  
 337 with  $R^2 = 0.94$ . Other parameters are fixed with constant values:  $\alpha_A = 0.5$ ,  $\alpha = 0.5$ ,  $\beta =$   
 338  $0.5$ ,  $K_\emptyset = 0.3$ ,  $n = 0.5$ ,  $\alpha_T = 0.8$ ,  $\alpha_L = 0.3$ ,  $K_C = 0.5$ ,  $K_P = 0.5$ ,  $d_A = 0.5$ ,  $D = 1.0$ .

339 **B. Linear correlation between half activation constant of T7RNAP ( $K_T$ ), and synthesis rate**  
 340 **of T7RNAP ( $\alpha_T$ ) in order to generate 3-ring patterns.**  $R^2 = 0.996$ . Other parameters are  
 341 fixed with constant values:  $\alpha_A = 0.5$ ,  $\alpha = 0.5$ ,  $\beta = 0.5$ ,  $K_\emptyset = 0.3$ ,  $n = 0.5$ ,  $\alpha_C = 0.5$ ,  $\alpha_L =$   
 342  $0.3$ ,  $K_C = 0.5$ ,  $K_P = 0.5$ ,  $d_A = 0.5$ ,  $D = 1.0$ .

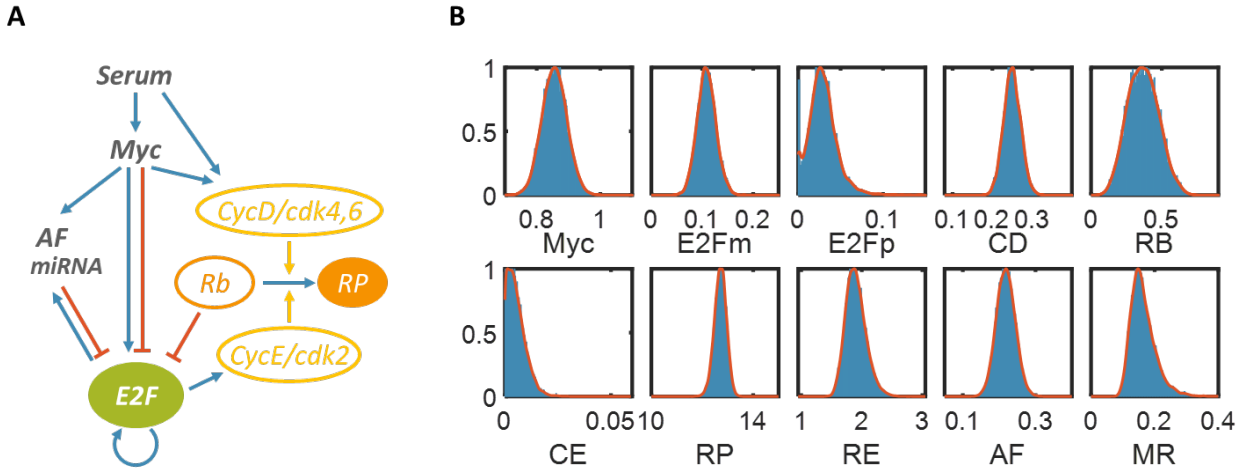

343

344 **Supplementary Figure 8: Stochastic Myc-E2F pathway in cell-cycle progression.** This model is  
 345 from Jeffrey Wong, et al<sup>77</sup>.

346 **A. Diagram of a concrete mechanism-based SDE model example.** E2F functions as the output  
 347 of the Rb-E2F signaling pathway and is involved in multiple positive-feedback loops (Fig. 1a). In  
 348 quiescent cells, E2F is bound to and repressed by Rb. With sufficient growth stimulation,  
 349 phosphorylation by Myc-induced *cyclin D* (CycD) - Cdk4,6 removes Rb repression; Myc also  
 350 induces E2F transcription. Subsequently, E2F activates the transcription of CycE, which forms a  
 351 complex with Cdk2 to further remove Rb repression by phosphorylation, establishing a positive-  
 352 feedback loop. E2F also activates its own transcription, constituting another positive-feedback  
 353 loop.

354 **B. Histogram of stochastic simulations.**  $10^4$  stochastic simulations are used to make this plot.  
 355 We split the data into 100 bins and plot the histogram with no gap between bars. With a sufficiently  
 356 large number of simulations, this distribution converges to an approximately continuous curve.  
 357 The red dotted curve is the kernel fitting using Matlab function *fitdist()*, which will be used as the  
 358 ground truth to train the neural network.

359

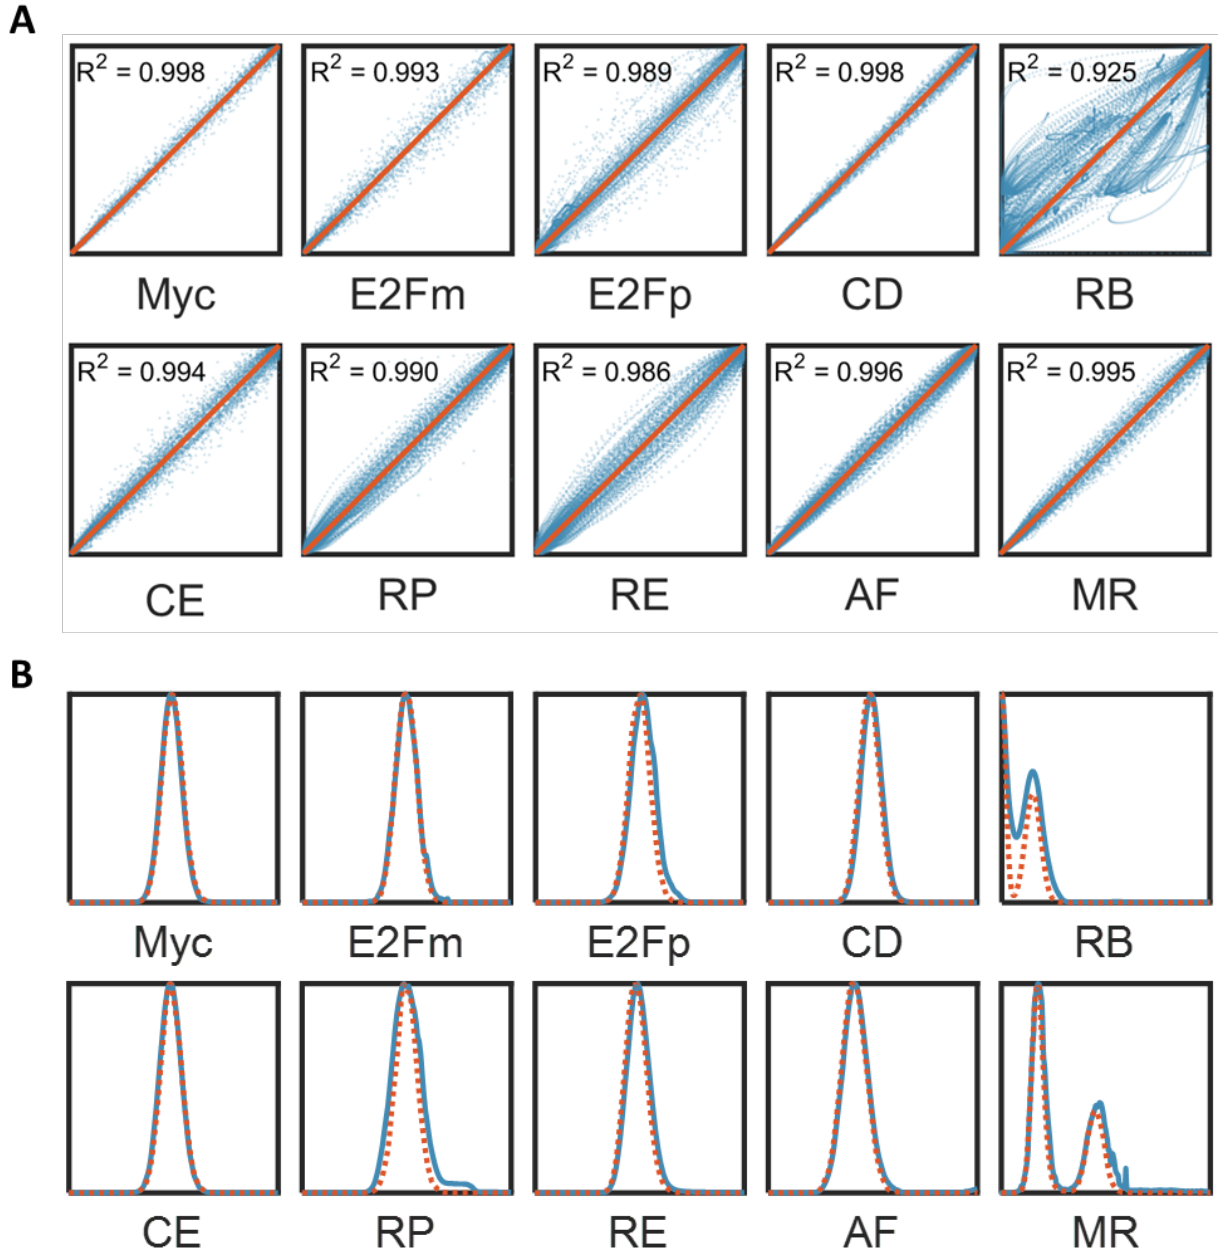

360

361

**Supplementary Figure 9: Neural network performance and sample prediction.**

362

**A. Accuracy analysis for deep LSTM network prediction system.** We plot the predicted

363

distributions by neural network against the distribution generated by numerical simulation. Perfect

364

alignment corresponds to the  $y = x$  line. We calculated the R-square to measure how close they

365

are. The test sample size is  $s (=10,000)$ . For each of the distribution, there are 1,000 discrete points

366

representing space segregation. The predictions of Rb distribution are not as good as others, we

367 speculate that the worse performance in predicting RB is likely due to the high sensitivity of RB  
368 distributions at certain parametric space.

369 **B. Representative distributional samples predicted by neural network.** Blue lines are the  
370 predicted distributions generated by trained neural network, red dashed lines are the distributions  
371 generated by numerical simulations.

372

## 373 Supplemental References

- 374 1 Payne, S. *et al.* Temporal control of self-organized pattern formation without morphogen  
375 gradients in bacteria. *Mol Syst Biol* **9**, 697, doi:10.1038/msb.2013.55 (2013).
- 376 2 Cao, Y. *et al.* Collective Space-Sensing Coordinates Pattern Scaling in Engineered Bacteria. *Cell* **165**,  
377 620-630, doi:10.1016/j.cell.2016.03.006 (2016).
- 378 3 Kenkre, V. M. Results from variants of the Fisher equation in the study of epidemics and bacteria.  
379 *Physica A* **342**, 242-248, doi:DOI 10.1016/j.physa.2004.04.084 (2004).
- 380 4 Murray, J. D., Cook, J., Tyson, R. & Lubkin, S. R. Spatial pattern formation in biology: I. Dermal  
381 wound healing. II. Bacterial patterns. *J Franklin I* **335B**, 303-332, doi:Doi 10.1016/S0016-  
382 0032(97)00034-3 (1998).
- 383 5 Maini, P. K. Using mathematical models to help understand biological pattern formation. *Comptes*  
384 *rendus biologiques* **327**, 225-234 (2004).
- 385 6 Kumar, A. & Patel, S. S. Inhibition of T7 RNA polymerase: Transcription initiation and transition  
386 from initiation to elongation are inhibited by T7 lysozyme via a ternary complex with RNA  
387 polymerase and promoter DNA. *Biochemistry-Us* **36**, 13954-13962, doi:Doi 10.1021/Bi971432y  
388 (1997).
- 389 7 Yao, G., Lee, T. J., Mori, S., Nevins, J. R. & You, L. C. A bistable Rb-E2F switch underlies the  
390 restriction point. *Nat Cell Biol* **10**, 476-U255, doi:10.1038/ncb1711 (2008).
- 391 8 Lee, T. J., Yao, G. A., Bennett, D. C., Nevins, J. R. & You, L. C. Stochastic E2F Activation and  
392 Reconciliation of Phenomenological Cell-Cycle Models. *Plos Biol* **8**,  
393 doi:10.1371/journal.pbio.1000488 (2010).
- 394 9 Gillespie, D. T. The chemical Langevin equation. *J Chem Phys* **113**, 297-306, doi:10.1063/1.481811  
395 (2000).
- 396 10 Forsyth, D. & Ponce, J. *Computer vision : a modern approach*. (Prentice Hall, 2003).
- 397 11 He, K., Zhang, X., Ren, S. & Sun, J. Spatial Pyramid Pooling in Deep Convolutional Networks for  
398 Visual Recognition. *IEEE Trans Pattern Anal Mach Intell* **37**, 1904-1916,  
399 doi:10.1109/TPAMI.2015.2389824 (2015).
- 400 12 Goodfellow, I., Bengio, Y. & Courville, A. Deep Generative Models. *Adapt Comput Mach Le*, 645-  
401 710 (2016).
- 402 13 Jaitly, N. & Hinton, G. Learning a Better Representation of Speech Soundwaves Using Restricted  
403 Boltzmann Machines. *Int Conf Acoust Spee*, 5884-5887 (2011).
- 404 14 Graves, A., Mohamed, A. R. & Hinton, G. Speech Recognition with Deep Recurrent Neural  
405 Networks. *2013 Ieee International Conference on Acoustics, Speech and Signal Processing (Icassp)*,  
406 6645-6649 (2013).
- 407 15 Sainath, T. N., Mohamed, A. R., Kingsbury, B. & Ramabhadran, B. Deep Convolutional Neural  
408 Networks for Lvcsr. *2013 Ieee International Conference on Acoustics, Speech and Signal Processing*  
409 *(Icassp)*, 8614-8618 (2013).

- 410 16 Lu, L., Zhang, X. X., Cho, K. H. & Renals, S. A Study of the Recurrent Neural Network Encoder-  
411 Decoder for Large Vocabulary Speech Recognition. *16th Annual Conference of the International*  
412 *Speech Communication Association (Interspeech 2015)*, Vols 1-5, 3249-3253 (2015).
- 413 17 Gibney, E. Google AI algorithm masters ancient game of Go. *Nature* **529**, 445-446,  
414 doi:10.1038/529445a (2016).
- 415 18 Silver, D. *et al.* Mastering the game of Go with deep neural networks and tree search. *Nature* **529**,  
416 484-489, doi:10.1038/nature16961 (2016).
- 417 19 Silver, D. *et al.* Mastering the game of Go without human knowledge. *Nature* **550**, 354-359,  
418 doi:10.1038/nature24270 (2017).
- 419 20 Alipanahi, B., DeLong, A., Weirauch, M. T. & Frey, B. J. Predicting the sequence specificities of DNA-  
420 and RNA-binding proteins by deep learning. *Nat Biotechnol* **33**, 831-838, doi:10.1038/nbt.3300  
421 (2015).
- 422 21 LeCun, Y., Bengio, Y. & Hinton, G. Deep learning. *Nature* **521**, 436-444, doi:10.1038/nature14539  
423 (2015).
- 424 22 Putin, E. *et al.* Deep biomarkers of human aging: Application of deep neural networks to  
425 biomarker development. *Aging (Albany NY)* **8**, 1021-1033 (2016).
- 426 23 Ananthkrishnan, A. N. *et al.* Gut Microbiome Function Predicts Response to Anti-integrin Biologic  
427 Therapy in Inflammatory Bowel Diseases. *Cell Host Microbe* **21**, 603-610 e603,  
428 doi:10.1016/j.chom.2017.04.010 (2017).
- 429 24 Esteva, A. *et al.* Dermatologist-level classification of skin cancer with deep neural networks.  
430 *Nature* **542**, 115-118, doi:10.1038/nature21056 (2017).
- 431 25 Altae-Tran, H., Ramsundar, B., Pappu, A. S. & Pande, V. Low Data Drug Discovery with One-Shot  
432 Learning. *ACS Cent Sci* **3**, 283-293 (2017).
- 433 26 Camacho, D. M., Collins, K. M., Powers, R. K., Costello, J. C. & Collins, J. J. Next-Generation Machine  
434 Learning for Biological Networks. *Cell* **173**, 1581-1592, doi:10.1016/j.cell.2018.05.015 (2018).
- 435 27 Ryu, J. Y., Kim, H. U. & Lee, S. Y. Deep learning improves prediction of drug-drug and drug-food  
436 interactions. *Proceedings of the National Academy of Sciences of the United States of America* **115**,  
437 E4304-E4311 (2018).
- 438 28 Lagaris, I. E., Likas, A. & Fotiadis, D. I. Artificial neural networks for solving ordinary and partial  
439 differential equations. *IEEE Trans Neural Netw* **9**, 987-1000, doi:10.1109/72.712178 (1998).
- 440 29 Lagaris, I. E., Likas, A. C. & Papageorgiou, D. G. Neural-network methods for boundary value  
441 problems with irregular boundaries. *Ieee T Neural Networ* **11**, 1041-1049, doi:Doi  
442 10.1109/72.870037 (2000).
- 443 30 Parisi, D. R., Mariani, M. C. & Laborde, M. A. Solving differential equations with unsupervised  
444 neural networks. *Chem Eng Process* **42**, 715-721, doi:10.1016/S0255-2701(02)00207-6 (2003).
- 445 31 Malek, A. & Beidokhti, R. S. Numerical solution for high order differential equations using a hybrid  
446 neural network - Optimization method. *Appl Math Comput* **183**, 260-271,  
447 doi:10.1016/j.amc.2006.05.068 (2006).
- 448 32 Baymani, M., Kerayechian, A. & Effati, S. Artificial neural networks approach for solving stokes  
449 problem. *Applied Mathematics* **1**, 288-292, doi:10.4236/am.2010.14037 (2010).



- 450 33 Chiaramonte, M. & Kiener, M. Solving differential equations using neural networks. *Machine*  
451 *Learning Project*, 1-5 (2013).
- 452 34 Rudd, K. & Ferrari, S. A constrained integration (CINT) approach to solving partial differential  
453 equations using artificial neural networks. *Neurocomputing* **155**, 277-285,  
454 doi:10.1016/j.neucom.2014.11.058 (2015).
- 455 35 E, W. N., Han, J. Q. & Jentzen, A. Deep Learning-Based Numerical Methods for High-Dimensional  
456 Parabolic Partial Differential Equations and Backward Stochastic Differential Equations. *Commun*  
457 *Math Stat* **5**, 349-380, doi:10.1007/s40304-017-0117-6 (2017).
- 458 36 Pakdaman, M., Ahmadian, A., Effati, S., Salahshour, S. & Baleanu, D. Solving differential equations  
459 of fractional order using an optimization technique based on training artificial neural network.  
460 *Appl Math Comput* **293**, 81-95, doi:10.1016/j.amc.2016.07.021 (2017).
- 461 37 Raissi, M., Perdikaris, P. & Karniadakis, G. E. Physics-informed neural networks: A deep learning  
462 framework for solving forward and inverse problems involving nonlinear partial differential  
463 equations. *J Comput Phys* **378**, 686-707, doi:10.1016/j.jcp.2018.11.045 (2019).
- 464 38 Rumelhart, D. E., Hinton, G. E. & Williams, R. J. Learning Representations by Back-Propagating  
465 Errors. *Nature* **323**, 533-536, doi:DOI 10.1038/323533a0 (1986).
- 466 39 Géron, A. I. *Hands-on machine learning with Scikit-Learn and TensorFlow : concepts, tools, and*  
467 *techniques to build intelligent systems*. First edition. edn, (O'Reilly Media, Inc., 2017).
- 468 40 Goodfellow, I., Bengio, Y. & Courville, A. Deep Learning. *Adapt Comput Mach Le*, 1-775 (2016).
- 469 41 Pascanu, R., Mikolov, T. & Bengio, Y. in *Proceedings of the 30th International Conference on*  
470 *Machine Learning* Vol. 28 (eds Dasgupta Sanjoy & McAllester David) 1310--1318 (PMLR,  
471 Proceedings of Machine Learning Research, 2013).
- 472 42 Hochreiter, S. & Schmidhuber, J. Long short-term memory. *Neural Comput* **9**, 1735-1780 (1997).
- 473 43 Graves, A. & Schmidhuber, J. Framewise phoneme classification with bidirectional LSTM and other  
474 neural network architectures. *Neural Netw* **18**, 602-610, doi:10.1016/j.neunet.2005.06.042  
475 (2005).
- 476 44 Vinyals, W. Z. a. I. S. a. O. Recurrent Neural Network Regularization. (2015).
- 477 45 He, K. M., Zhang, X. Y., Ren, S. Q. & Sun, J. Delving Deep into Rectifiers: Surpassing Human-Level  
478 Performance on ImageNet Classification. *Ieee I Conf Comp Vis*, 1026-1034,  
479 doi:10.1109/lccv.2015.123 (2015).
- 480 46 Song, H., Payne, S., Gray, M. & You, L. Spatiotemporal modulation of biodiversity in a synthetic  
481 chemical-mediated ecosystem. *Nat Chem Biol* **5**, 929-935, doi:10.1038/nchembio.244 (2009).
- 482 47 You, L., Cox, R. S., 3rd, Weiss, R. & Arnold, F. H. Programmed population control by cell-cell  
483 communication and regulated killing. *Nature* **428**, 868-871, doi:10.1038/nature02491 (2004).
- 484 48 Collins, C. H., Leadbetter, J. R. & Arnold, F. H. Dual selection enhances the signaling specificity of  
485 a variant of the quorum-sensing transcriptional activator LuxR. *Nature biotechnology* **24**, 708-712,  
486 doi:10.1038/nbt1209 (2006).
- 487 49 Aronson, D., Weinberger, H. & Multidimensional nonlinear diffusion arising in population genetics.  
488 *Advances in Mathematics* **30.1**, 33-76 (1978).

489 50 Hsiao, K. M., McMahon, S. L. & Farnham, P. J. Multiple DNA elements are required for the growth  
490 regulation of the mouse E2F1 promoter. *Genes Dev* **8**, 1526-1537 (1994).

491 51 Smith, E. J., Leone, G., DeGregori, J., Jakoi, L. & Nevins, J. R. The accumulation of an E2F-p130  
492 transcriptional repressor distinguishes a G0 cell state from a G1 cell state. *Mol Cell Biol* **16**, 6965-  
493 6976 (1996).

494 52 Kholodenko, B. N. Cell-signalling dynamics in time and space. *Nat Rev Mol Cell Biol* **7**, 165-176,  
495 doi:10.1038/nrm1838 (2006).

496 53 Apicelli, A. J. *et al.* A non-tumor suppressor role for basal p19ARF in maintaining nucleolar  
497 structure and function. *Mol Cell Biol* **28**, 1068--1080 (2008).

498 54 Pickering, M. T., Stadler, B. M. & Kowalik, T. F. miR-17 and miR-20a temper an E2F1-induced G1  
499 checkpoint to regulate cell cycle progression. *Oncogene* (2008).

500 55 Martelli, F. *et al.* p19ARF targets certain E2F species for degradation. *Proc Natl Acad Sci U S A* **98**,  
501 4455-4460, doi:10.1073/pnas.081061398 (2001).

502 56 Pan, W., Sun, T., Hoess, R. & Grafstrom, R. Defining the minimal portion of the retinoblastoma  
503 protein that serves as an efficient substrate for cdk4 kinase/cyclin D1 complex. *Carcinogenesis* **19**,  
504 765-769 (1998).

505 57 Grafstrom, R. H., Pan, W. & Hoess, R. H. Defining the substrate specificity of cdk4 kinase-cyclin D1  
506 complex. *Carcinogenesis* **20**, 193-198 (1999).

507 58 Park, S. *et al.* Determination of binding constant of transcription factor myc-max/max-max and E-  
508 box DNA: the effect of inhibitors on the binding. *Biochim Biophys Acta* **1670**, 217-228,  
509 doi:10.1016/j.bbagen.2003.12.007 (2004).

510 59 Bartley, S. M., Szakaly, R. J. & Farnham, P. J. Characterization of the 3' untranslated region of  
511 mouse E2F1 mRNA. *Gene* **223**, 355-360 (1998).

512 60 Saunders, N. A., Dicker, A. J., Jones, S. J. & Dahler, A. L. E2F1 messenger RNA is destabilized in  
513 response to a growth inhibitor in normal human keratinocytes but not in a squamous carcinoma  
514 cell line. *Cancer Res* **58**, 1646-1649 (1998).

515 61 Helin, K. Regulation of cell proliferation by the E2F transcription factors. *Curr Opin Genet Dev* **8**,  
516 28-35, doi:S0959-437X(98)80058-0 [pii] (1998).

517 62 Diehl, J. A., Zindy, F. & Sherr, C. J. Inhibition of cyclin D1 phosphorylation on threonine-286  
518 prevents its rapid degradation via the ubiquitin-proteasome pathway. *Genes Dev* **11**, 957-972  
519 (1997).

520 63 Sherr, C. J. & Roberts, J. M. CDK inhibitors: positive and negative regulators of G1-phase  
521 progression. *Genes Dev* **13**, 1501-1512 (1999).

522 64 Clurman, B. E., Sheaff, R. J., Thress, K., Groudine, M. & Roberts, J. M. Turnover of cyclin E by the  
523 ubiquitin-proteasome pathway is regulated by cdk2 binding and cyclin phosphorylation. *Genes*  
524 *Dev* **10**, 1979-1990 (1996).

525 65 Won, K. A. & Reed, S. I. Activation of cyclin E/CDK2 is coupled to site-specific autophosphorylation  
526 and ubiquitin-dependent degradation of cyclin E. *EMBO J* **15**, 4182-4193 (1996).

527 66 Mihara, K. *et al.* Cell cycle-dependent regulation of phosphorylation of the human retinoblastoma  
528 gene product. *Science* **246**, 1300-1303 (1989).

529 67 Buchler, N. E., Gerland, U. & Hwa, T. Nonlinear protein degradation and the function of genetic  
530 circuits. *Proc Natl Acad Sci U S A* **102**, 9559-9564, doi:10.1073/pnas.0409553102 (2005).

531 68 Sears, R., Leone, G., DeGregori, J. & Nevins, J. R. Ras enhances Myc protein stability. *Mol Cell* **3**,  
532 169-179 (1999).

533 69 Sears, R. *et al.* Multiple Ras-dependent phosphorylation pathways regulate Myc protein stability.  
534 *Genes Dev* **14**, 2501-2514 (2000).

535 70 Yeh, E. *et al.* A signalling pathway controlling c-Myc degradation that impacts oncogenic  
536 transformation of human cells. *Nat Cell Biol* **6**, 308-318, doi:10.1038/ncb1110 (2004).

537 71 Bertwistle, D., Sugimoto, M. & Sherr, C. J. Physical and functional interactions of the Arf tumor  
538 suppressor protein with nucleophosmin/B23. *Mol Cell Biol* **24**, 985-996 (2004).

539 72 Colombo, E. *et al.* Nucleophosmin is required for DNA integrity and p19Arf protein stability. *Mol*  
540 *Cell Biol* **25**, 8874-8886, doi:10.1128/MCB.25.20.8874-8886.2005 (2005).

541 73 Kuo, M. L., den Besten, W., Bertwistle, D., Roussel, M. F. & Sherr, C. J. N-terminal  
542 polyubiquitination and degradation of the Arf tumor suppressor. *Genes Dev* **18**, 1862-1874,  
543 doi:10.1101/gad.1213904 (2004).

544 74 Pollice, A. *et al.* Functional and physical interaction of the human ARF tumor suppressor with Tat-  
545 binding protein-1. *J Biol Chem* **279**, 6345-6353, doi:10.1074/jbc.M310957200 (2004).

546 75 O'Donnell, K. A., Wentzel, E. A., Zeller, K. I., Dang, C. V. & Mendell, J. T. c-Myc-regulated microRNAs  
547 modulate E2F1 expression. *Nature* **435**, 839-843 (2005).

548 76 Géron, A. I. *Hands-on machine learning with Scikit-Learn and TensorFlow : concepts, tools, and*  
549 *techniques to build intelligent systems*. First edition. edn.

550 77 Wong, J. V., Yao, G., Nevins, J. R. & You, L. Viral-mediated noisy gene expression reveals biphasic  
551 E2f1 response to MYC. *Mol Cell* **41**, 275-285, doi:10.1016/j.molcel.2011.01.014 (2011).

552
